# Supplementary material for: Proteomic Analysis of miR-195 and miR-497 Replacement Reveals Potential Candidates that Increase Sensitivity to Oxaliplatin in MSI/P53wt Colorectal Cancer Cells
Source: PubMed Central journal article supplement (PMC6770888; doi:10.3390/cells8091111), 2019-09-19
Supplement: cells-08-01111-s001.pdf [file cells-08-01111-s001.pdf]

**Supplementary Figures: Proteomic analysis of miR-195 and miR-497 replacement reveals potential candidates that increase sensitivity to oxaliplatin in MSI/P53wt colorectal cancer cells**

**Supplementary Figure S1:** Workflow and datamining of proteomics data.

**Supplementary Figure S2:** Cell viability and clonogenic assays of DLD1 and SW480 cells after treatment with chemotherapy, and mRNA expression in SW480 cells.

**Supplementary Figure S3.** Unsupervised cluster analysis of detected peptides in CRC cells.

**Supplementary Figure S4:** Supervised cluster analysis of differentially expressed peptides between wild-type cells and negative control transfected cells.

**Supplementary Figure S5:** Supervised cluster analysis of differentially expressed peptides between negative control transfected cells and cells transfected with miR-195-5p and miR-497-5p mimics.

**Supplementary Table S1:** Cell line characteristics of RKO, HCT116, SW480 and DLD1.

**Supplementary Table S2:** Significant up- and downregulated peptides after transfection of CRC cells with miR-195-5p mimic and miR-497-5p mimic.

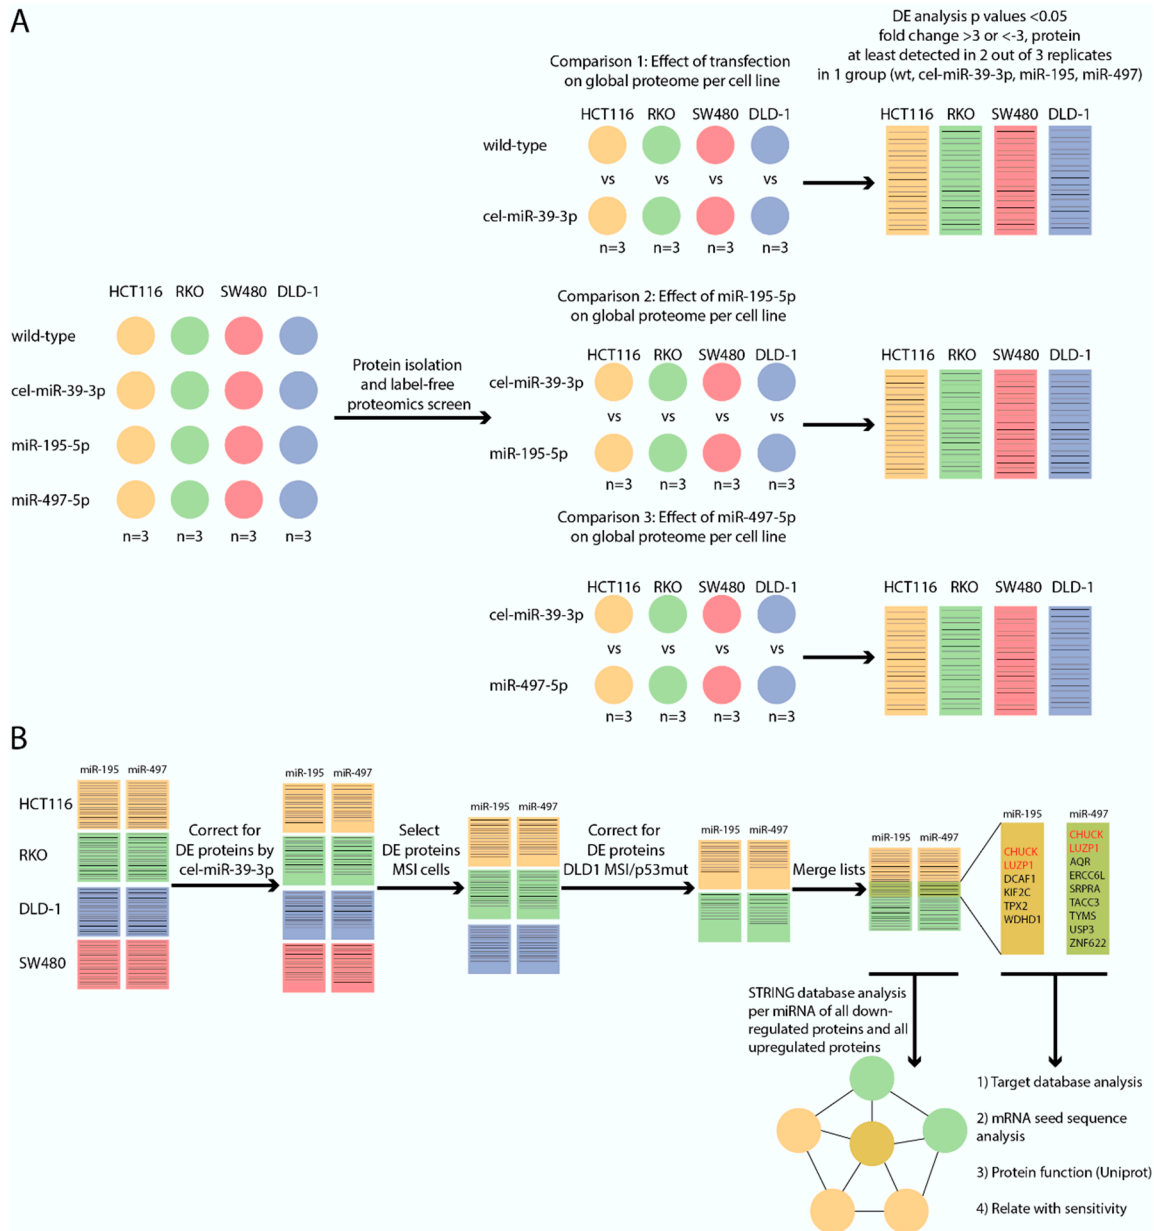

**Supplementary Figure S1. Workflow and datamining of proteomics data.** (A) Cell line transfections, number of replicates per cell line and comparisons for analyses of differentially expressed (DE) proteins. First, each cell line was transfected in triplicate with cel-miR-39-3p, miR-195-5p mimic and miR-497-5p mimic, in addition, triplicate non-transfected cells (wild-type) were included. Second, 48 hours after transfection proteins were isolated and a label-free proteomics screen was performed. Third, 3 comparisons were performed for all 4 cell lines to obtain DE proteins. Comparison 1: to identify the proteins DE by the transfection itself, comparison 2 and 3: to identify the proteins DE by transfection of miR-195-5p and miR-497-5p mimics respectively. (B) Corrections and comparison to retrieve relevant DE proteins. DE proteins were corrected for the DE proteins in comparison 1 for each cell line. Next, DE proteins in MSI cell lines were selected for further analysis. Thereafter, DE proteins in sensitized cells, RKO and HCT116, were corrected for DE proteins in MSI cell line DLD-1 (no increased sensitivity to chemotherapy). Next, DE proteins in HCT116 and RKO cells were merged per miRNA. Finally, two analyses were performed: 1) all DE proteins per miRNA were subjected for STRING database analysis to identify the most relevant involved biological processes and 2) overlapping DE proteins per miRNA were associated to drug sensitivity using multiple different approaches (1-4 in figure) DE; differentially expressed.

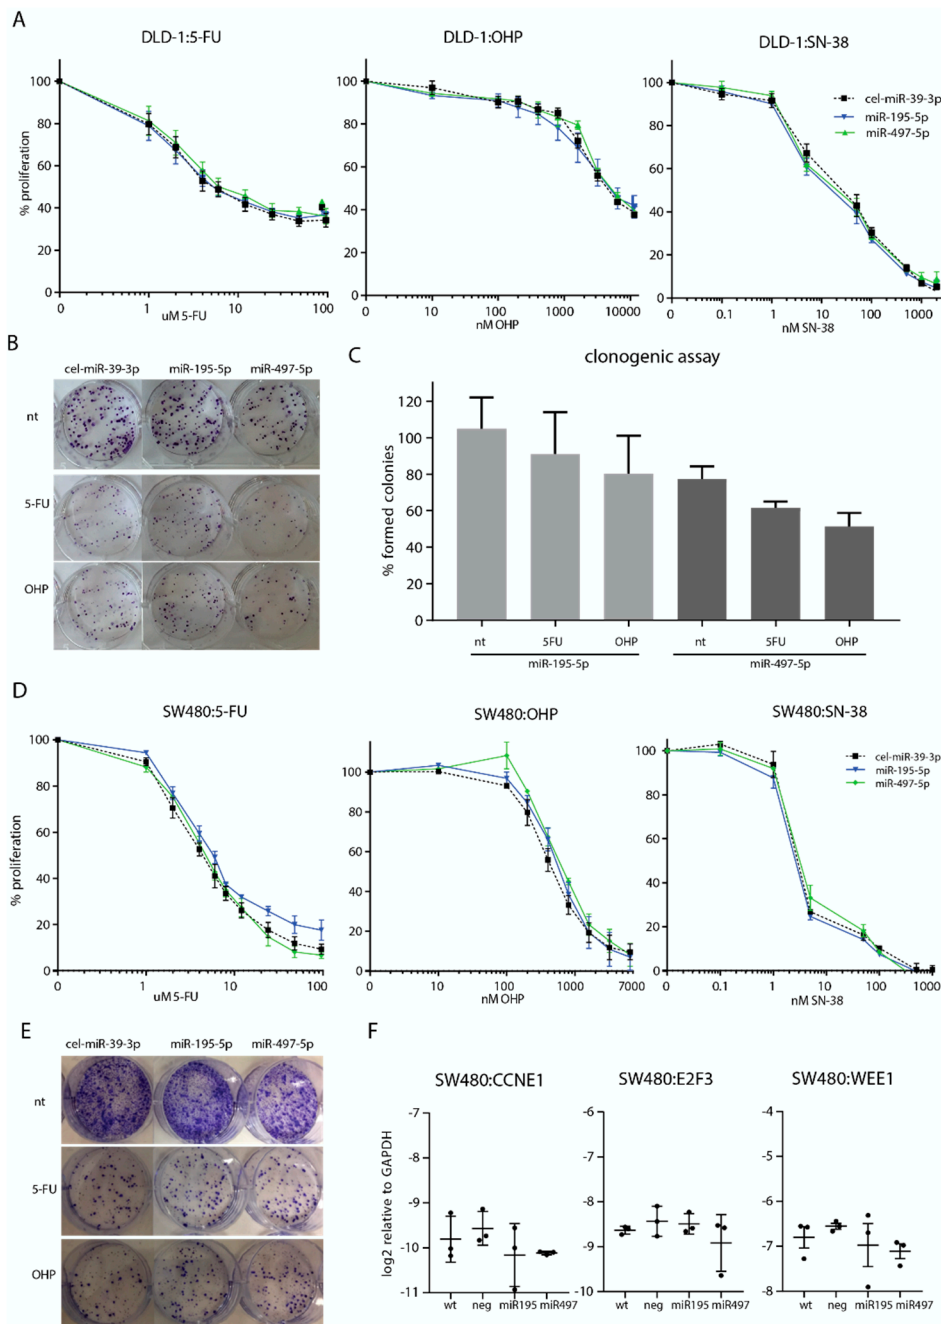

**Supplementary Figure S2. Cell viability and clonogenic assays of DLD1 and SW480 cells after treatment with chemotherapy, and mRNA expression in SW480 cells.** Cell viability assays were performed in three (DLD-1) and two (SW480) independent experiments in triplicate and are presented as average % proliferation compared to the proliferation of a non-treated control ( $\pm$  the standard error of the mean (SEM)): DLD-1 (**A**), SW480 (**D**). Pictures of a single clonogenic assay experiment of DLD-1 cells (**B**) and SW480 cells (**E**). (**C**) Percentage of colonies after transfection with miR-195-5p and miR-497-5p mimics compared to the negative control transfection (cel-miR-39-3p). Bars represent the average of duplicate colony counts from three independent experiments of DLD-1 plus the SEM. As there were too many formed colonies in the non-treated SW480 cells these were not quantified. (**F**) Expression levels of selected mRNA targets relative to the expression of GAPDH in SW480 of wild-type and transfected cells. Each target is quantified in duplicate in three independent experiments, presented as average  $\pm$  the standard error of the mean (SEM). 5-FU; 5-fluorouracil, OHP; oxaliplatin, SN-38; irinotecan, nt; no treatment.

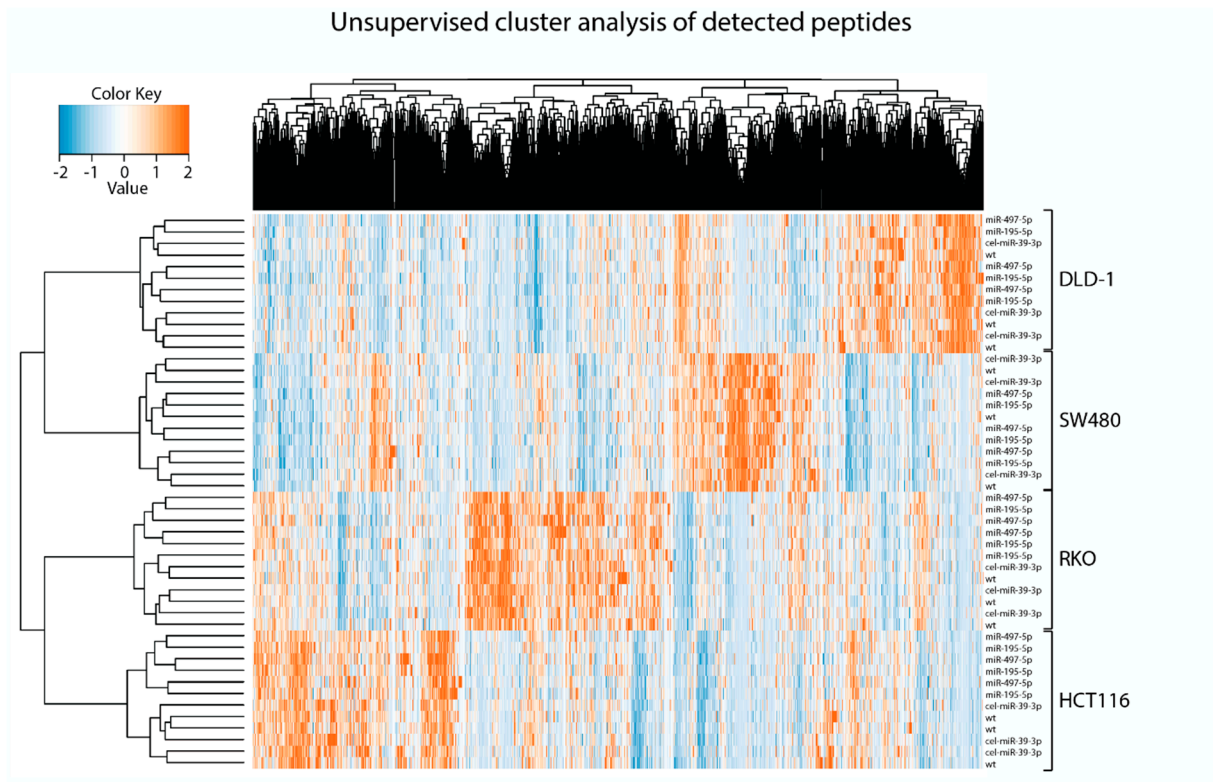

**Supplementary Figure S3. Unsupervised cluster analysis of detected peptides in CRC cells.** Each row represents detected peptides per condition (wild-type, cel-miR-39-3p, miR-195-5p mimic or miR497-5p mimic) per cell line (HCT116, RKO, SW480 or DLD-1). Each column represents a single peptide. Heatmap score: z-score of normalized spectral count. wt: wild-type.

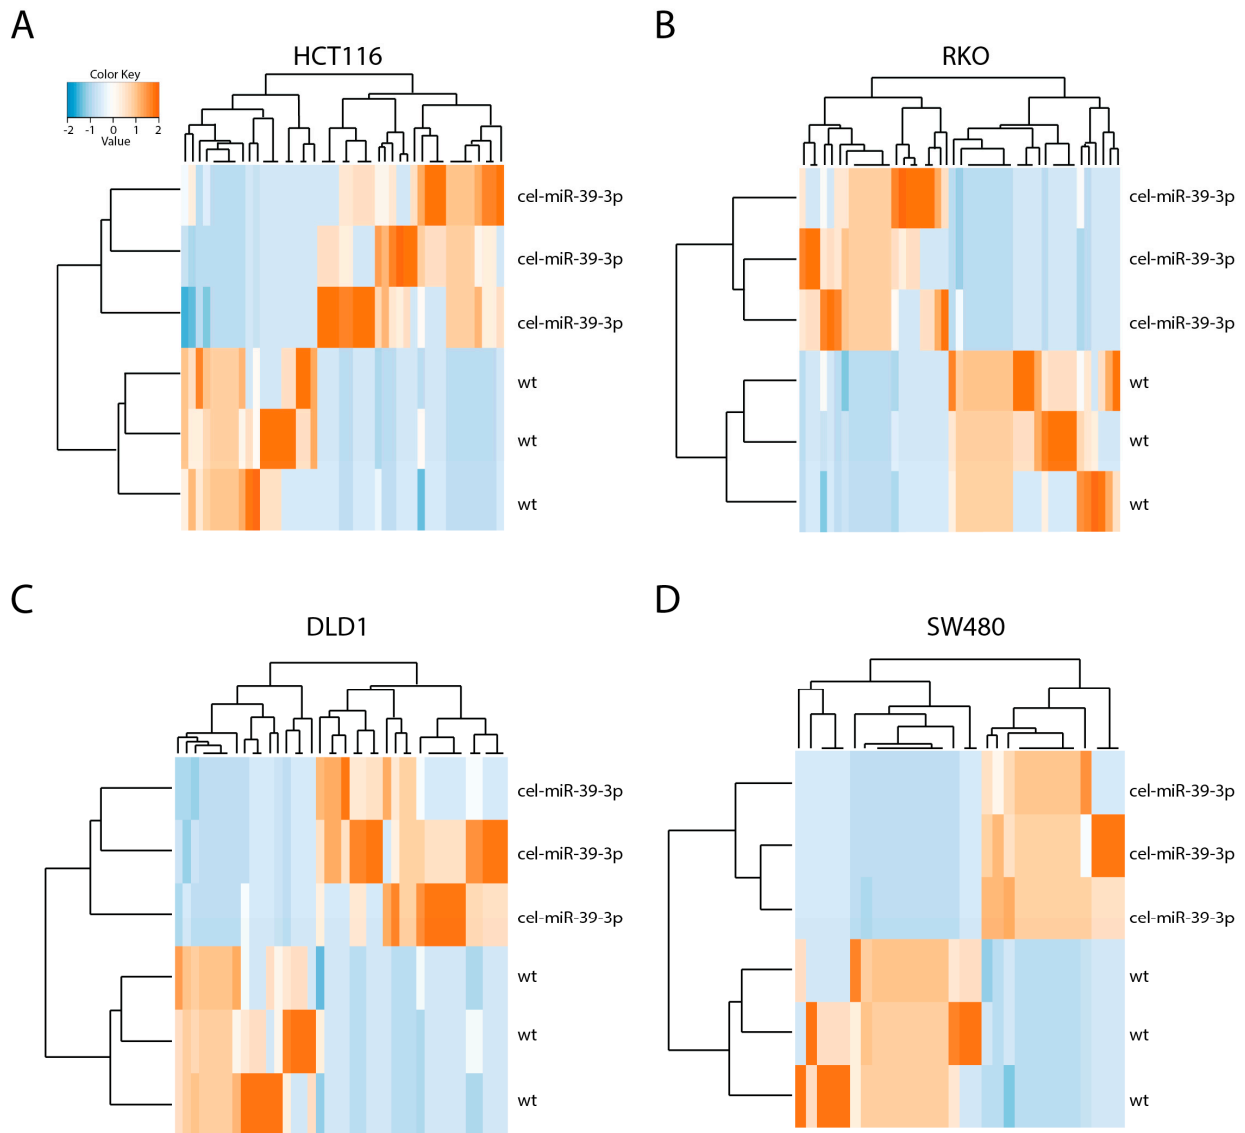

**Supplementary Figure S4. Supervised cluster analysis of differentially expressed peptides between wild-type cells and negative control transfected cells.** Significant different peptides in supervised clusters for HCT116 (A), RKO (B), DLD1 (C) and SW480 (D):  $p < 0.05$  not FDR corrected. Rows represent independent proteomic analyzes for each condition, cel-miR-39-3p and wt, performed in triplicate. Columns represent differentially expressed peptides. Heatmap score: z-score of normalized spectral count. wt: wild-type.

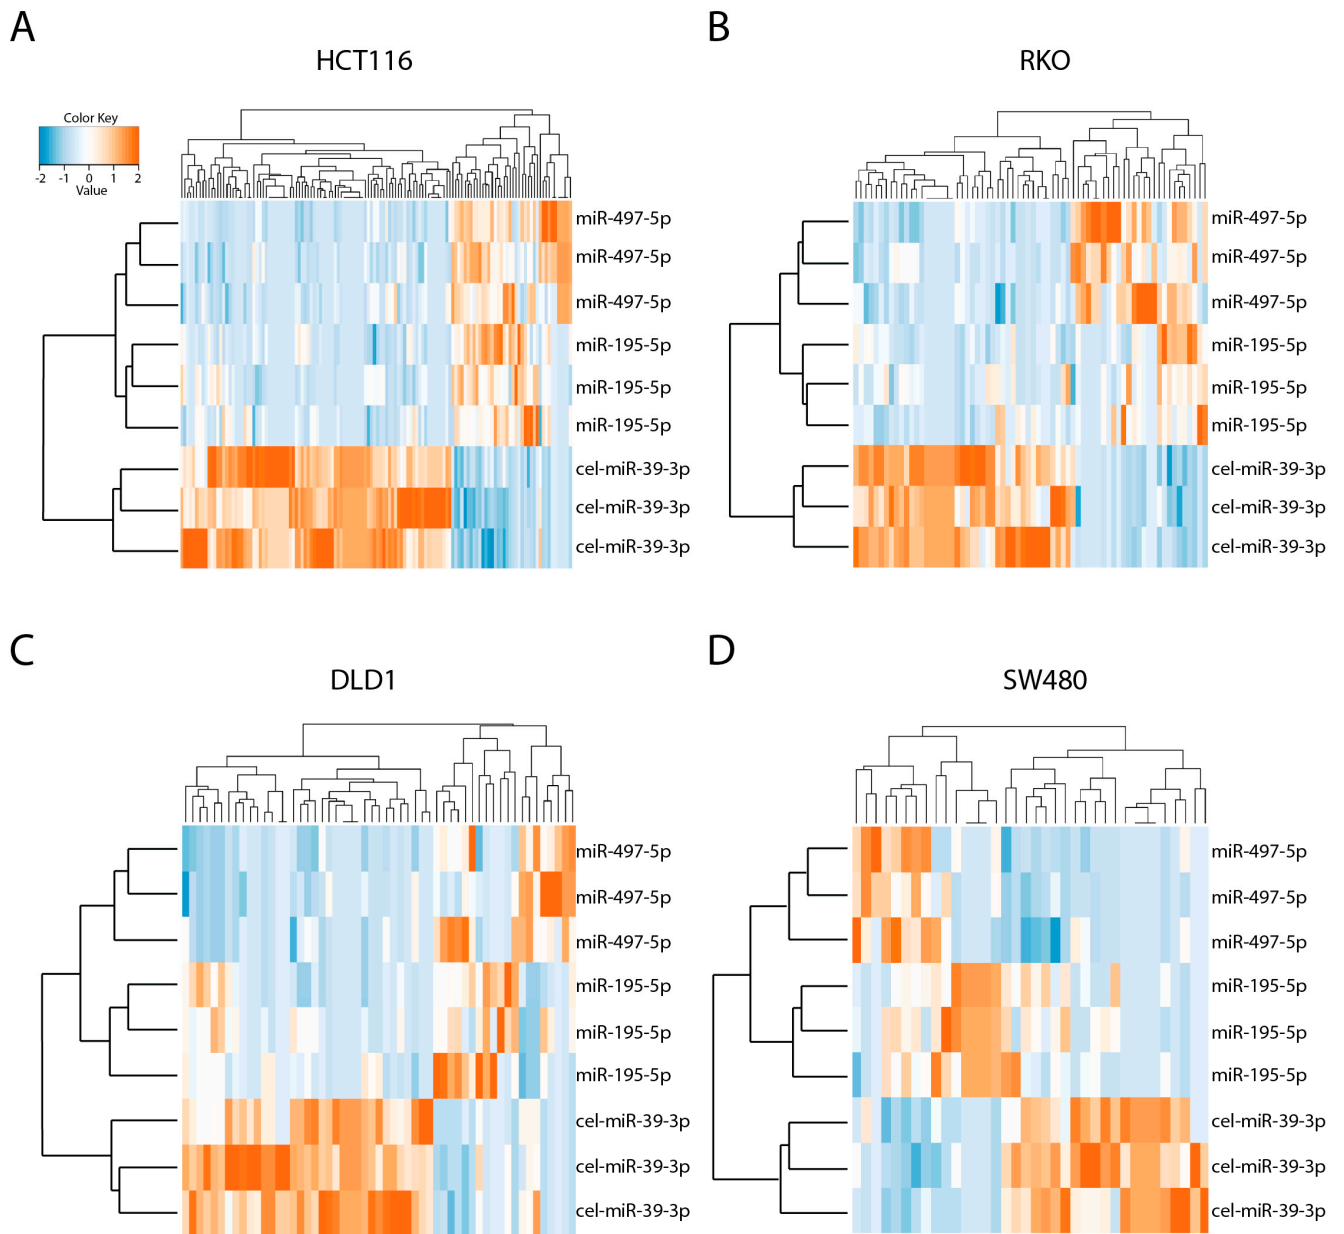

**Supplementary Figure S5. Supervised cluster analysis of differentially expressed peptides between negative control transfected cells and combined miR-195-5p and miR-497-5p transfected cells.** Significant different peptides after transfection with miR-195-5p and miR-497-5p in supervised clusters for HCT116 (A), RKO (B), DLD1 (C) and SW480 (D):  $p < 0.05$  not FDR corrected. Rows represent independent proteomic analyses for each condition, cel-miR-39-3p, miR-195-5p and miR-497-5p, performed in triplicate. Columns represent differentially expressed peptides. Heatmap score: z-score of normalized spectral count. wt: wild-type.
